# Supplementary material
Source: PubMed Central journal article supplement (PMC4894664)
Supplement: NIHMS714070-supplement.pdf [file NIHMS714070-supplement.pdf]

Supplemental Data

**A**

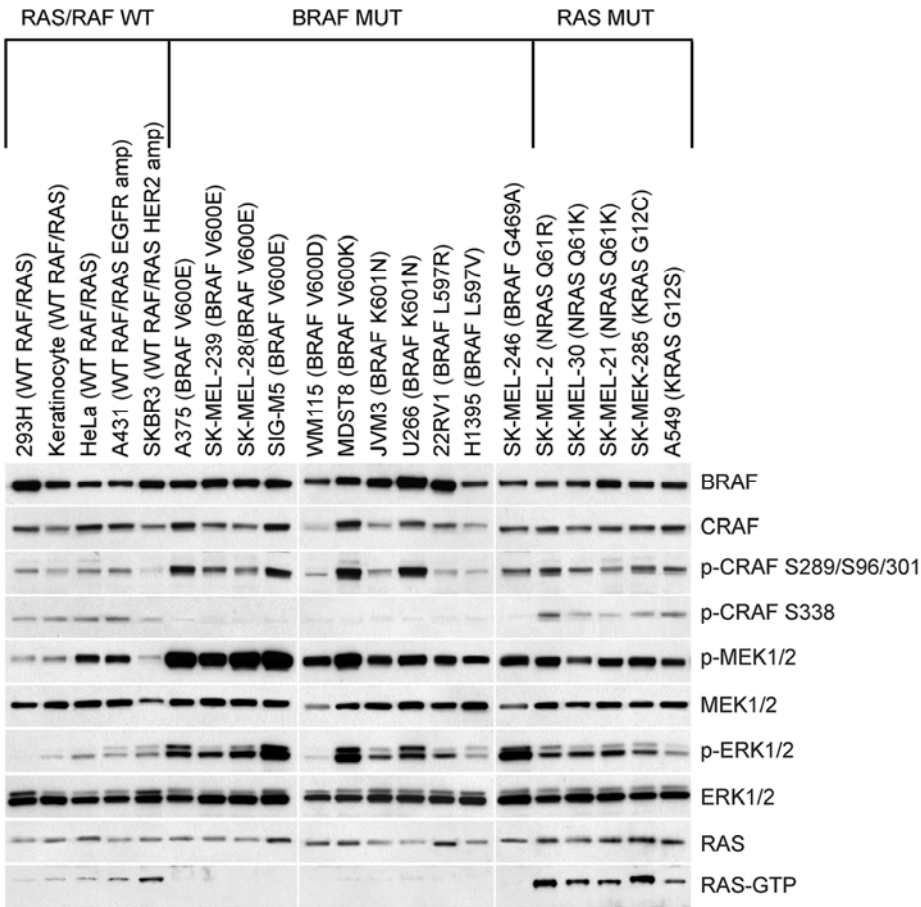

**B**

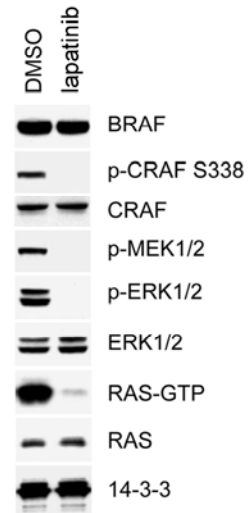

C

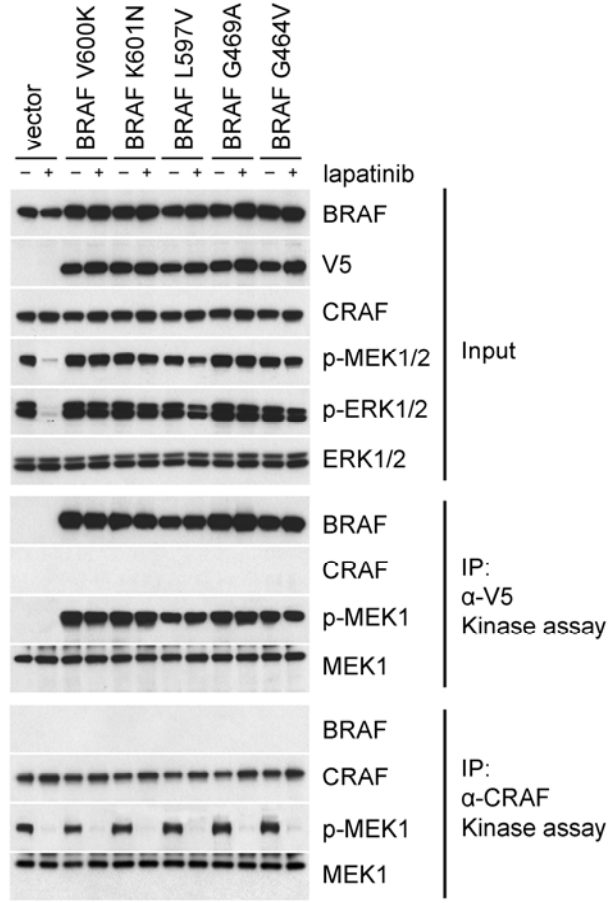

D

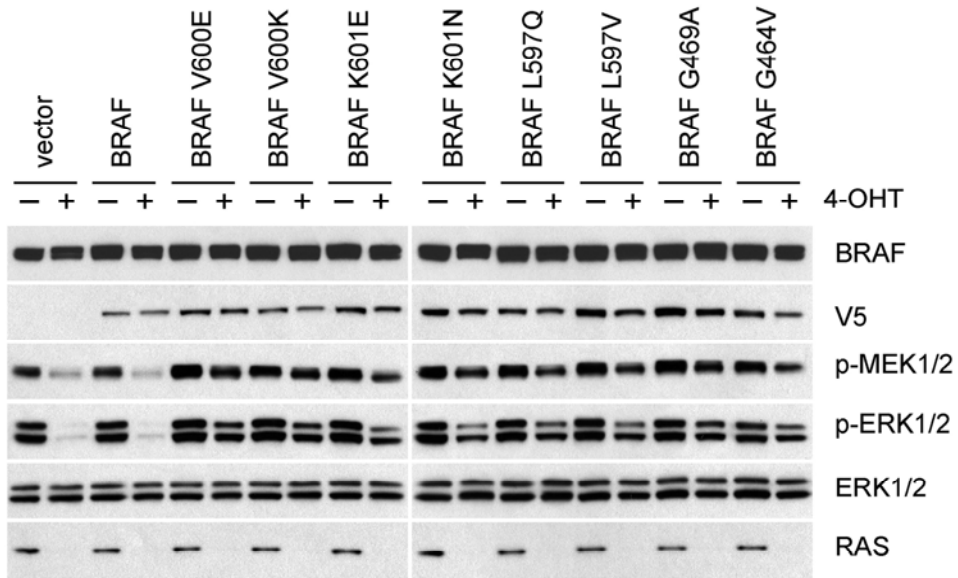

**Figure S1, related to Figure 1. Activating BRAF mutants feedback inhibit cellular RAS-GTP by activating ERK signaling in a RAS-independent manner**

(A) Western blot analysis for components of the RAS/RAF/ERK signaling pathway in keratinocytes and in a panel of cancer cell lines harboring the indicated mutations. Cellular RAS-GTP levels were determined by the active RAS pull-down assay.

(B) SKBR3 cells were treated with either vehicle or lapatinib (1  $\mu$ M) for 1 hr. Whole cell lysates were analyzed by Western blot using the indicated antibodies. RAS-GTP levels were determined using the active RAS pull-down assay.

(C) SKBR3 cells expressing V5 tagged BRAF mutants were treated with lapatinib (1  $\mu$ M) or DMSO for 1 hr. Cell lysates were divided into three portions and analyzed as follows: 5% of the cell extracts were used for immunoblot of whole cell lysate (Input panels). The remainder was divided equally and then subjected to immunoprecipitation with an anti-V5 antibody or immunoprecipitation with an anti-CRAF antibody. The immunoprecipitate was then used for an in vitro kinase assay with 0.5  $\mu$ g K97R MEK1 protein.

(D) Mouse embryonic fibroblasts derived from *Hras*<sup>-/-</sup>; *Nras*<sup>-/-</sup>; *Kras*<sup>lox/lox</sup>; RERT<sup>ert/ert</sup> mice (K-Ras lox MEFs) were grown in medium with or without 1  $\mu$ M 4-OHT for a week to generate isogenic cells expressing or lacking K-Ras. Cells were then transfected with pcDNA3 plasmids expressing wild-type BRAF or the BRAF mutants listed. Cells were collected 16 hr after transfection, whole cell lysates prepared and ERK pathway activity examined by Western blot.

**A**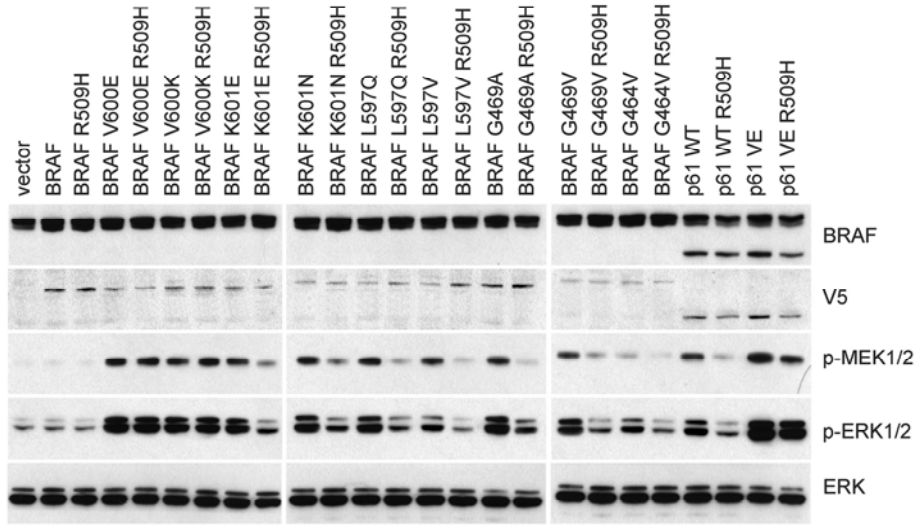**B**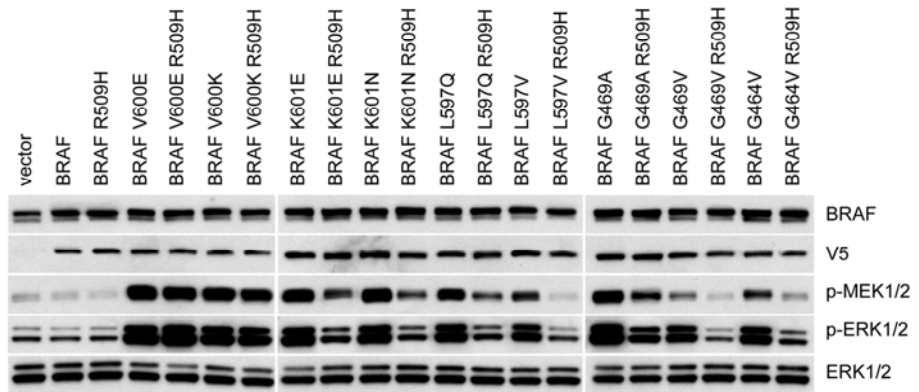

**C**

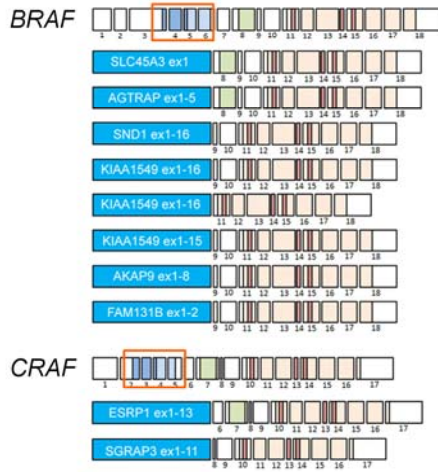

**D**

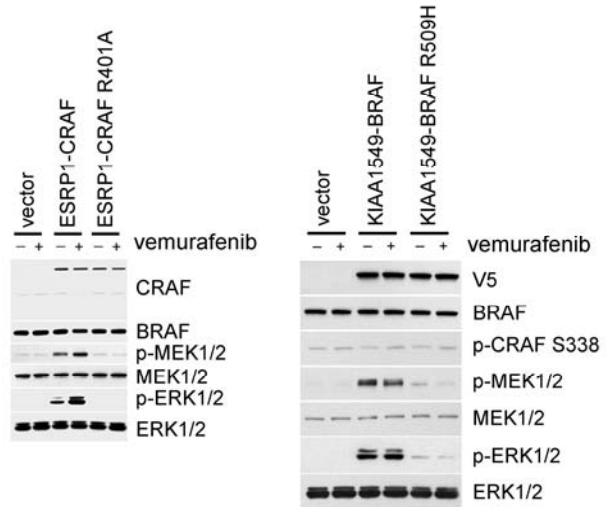

**E**

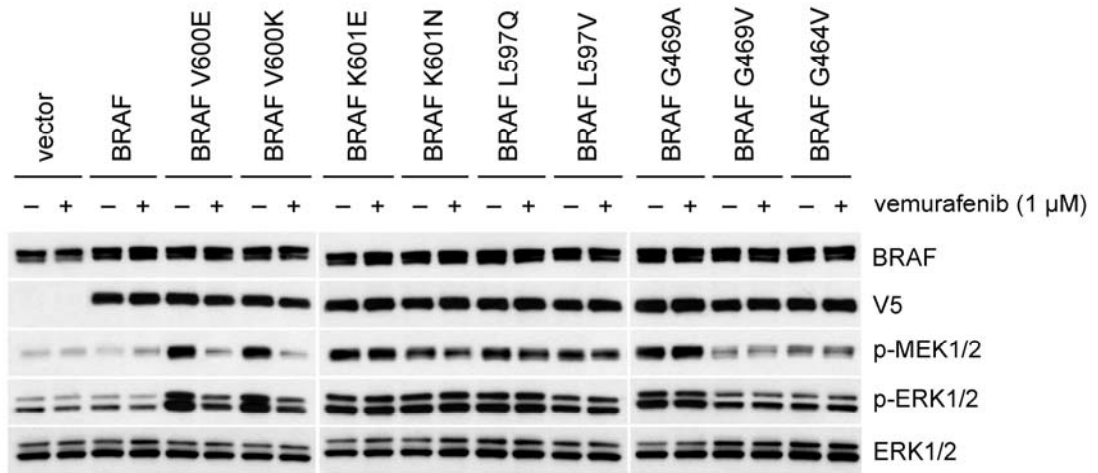

**Figure S2, related to Figure 2. ERK signaling driven by oncogenic RAF dimers is insensitive to vemurafenib treatment**

(A) K-Ras lox MEFs were grown in medium with 1  $\mu$ M 4-OHT for a week. Cells were then transfected with pcDNA3 plasmids encoding wild-type BRAF or the BRAF mutants listed. Whole cell lysates were prepared 16 hr after transfection. ERK signaling was examined by Western blot.

(B) *Raf1* knockout MEFs were transfected with pcDNA3 vector or pcDNA3 plasmids expressing the listed BRAF mutants. 24 hr after transfection, cells were collected and lysed. Cell lysates were assayed by Western blot using the antibodies indicated.

(C) Schematic representation of RAF fusions identified in human cancers. In all cases, the RAS-binding domain is deleted from the resulting fusion.

(D) SKBR3 cells were transfected with pcDNA3 vector, pcDNA3-ESRP1-CRAF-FLAG, pcDNA3-ESRP1-CRAF R401A-FLAG, KIAA1549-BRAF-V5, or KIAA1549-BRAF R509H-V5. 24 hr after transfection, cells were treated with either vehicle or vemurafenib (1  $\mu$ M, 1 hr) followed by Western blot analysis using the indicated antibodies.

(E) *Raf1* knockout MEFs were transfected with pcDNA3 vector or pcDNA3 plasmids expressing the listed BRAF proteins. 24 hr after transfection, cells were treated with either vehicle or vemurafenib (1  $\mu$ M for 1 hr). Immunoblotting was then performed using the antibodies indicated.

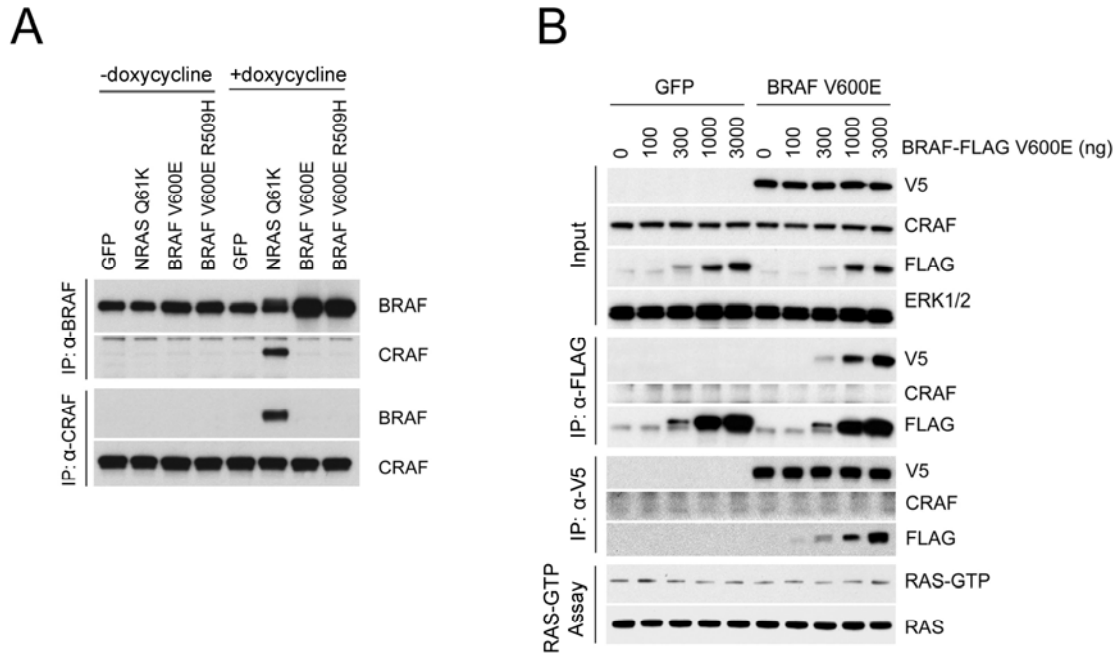

**Figure S3, related to Figure 3. BRAF V600E homo-dimers are induced by BRAF V600E overexpression**

(A) A375 clones expressing inducible GFP, NRAS Q61K, BRAF V600E or BRAF V600E R509H were treated with 0.5  $\mu$ g/ml doxycycline for 24 hr. Cell lysates were prepared from the indicated cells and subjected to immunoprecipitation using either anti-BRAF or anti-CRAF antibodies. The isolated protein complexes were then eluted and assayed by Western blot with anti-BRAF or anti-CRAF antibodies as indicated.

(B) A375 cells expressing either inducible GFP or V5-tagged BRAF V600E were cultured in doxycycline containing medium for 1 day. The cells were then transfected with the indicated amounts of pcDNA3-BRAF V600E-FLAG plasmid. The BRAF V600E dimer was isolated by immunoprecipitation and assayed by Western blot using the indicated antibodies. The levels of RAS-GTP were determined using the active RAS pull-down assay.

**A**

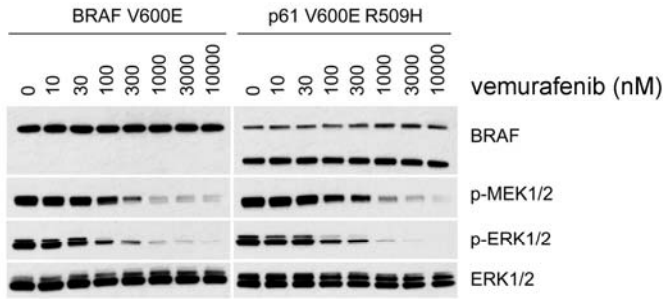

**B**

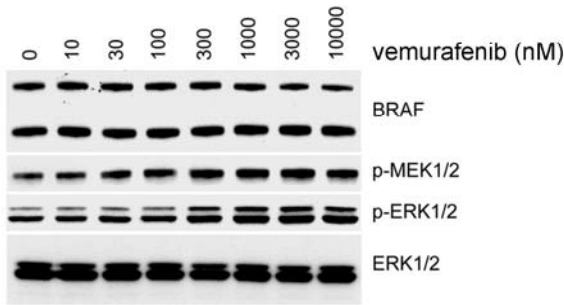

**C**

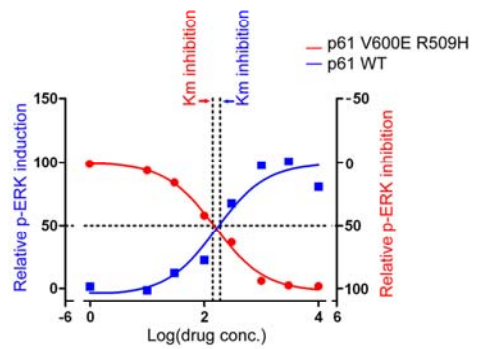

**D**

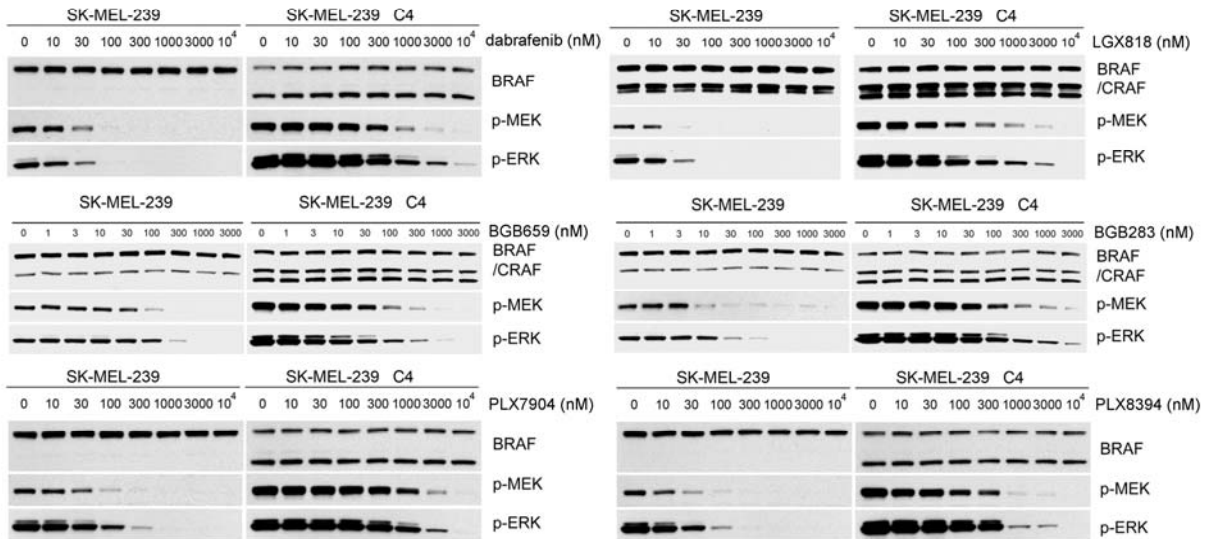



**E**

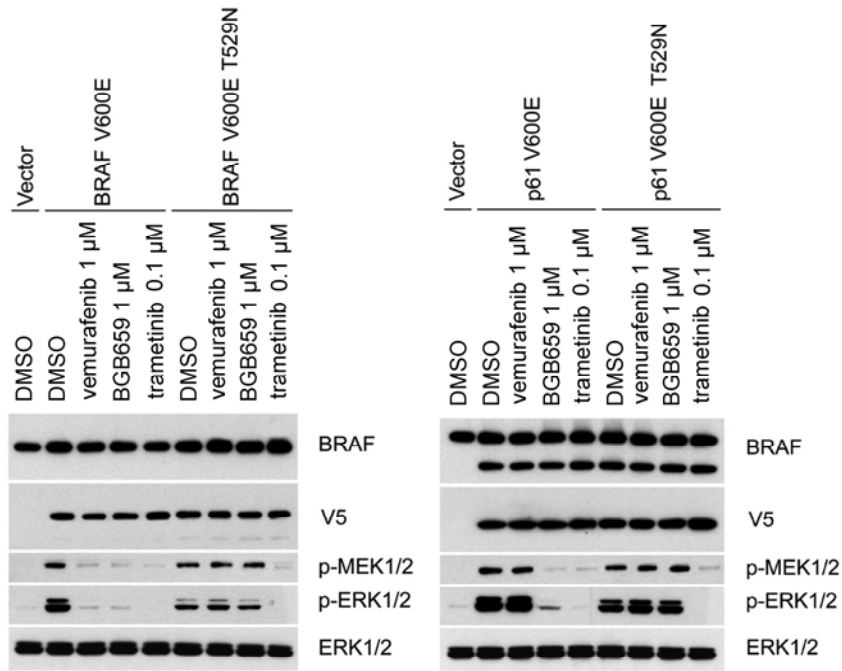

**F**

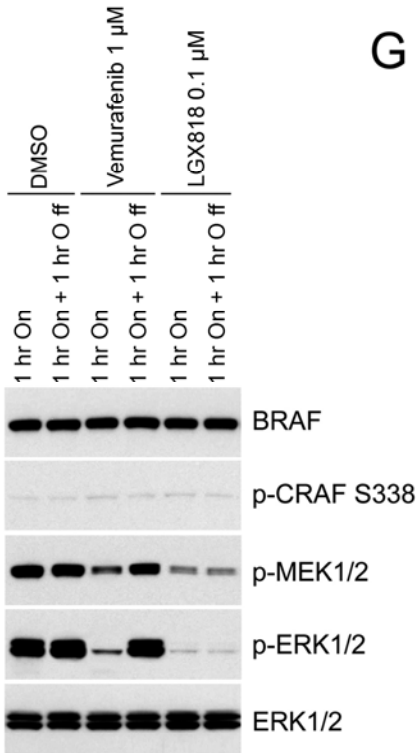

**G**

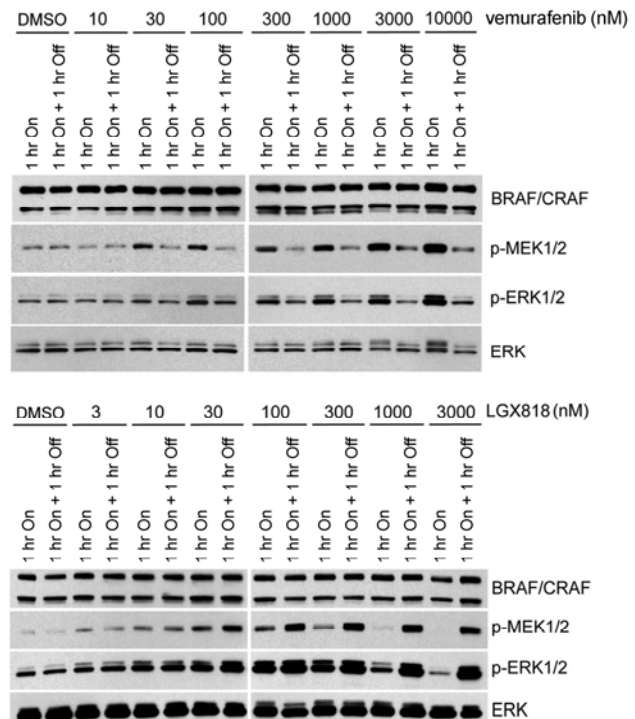

H

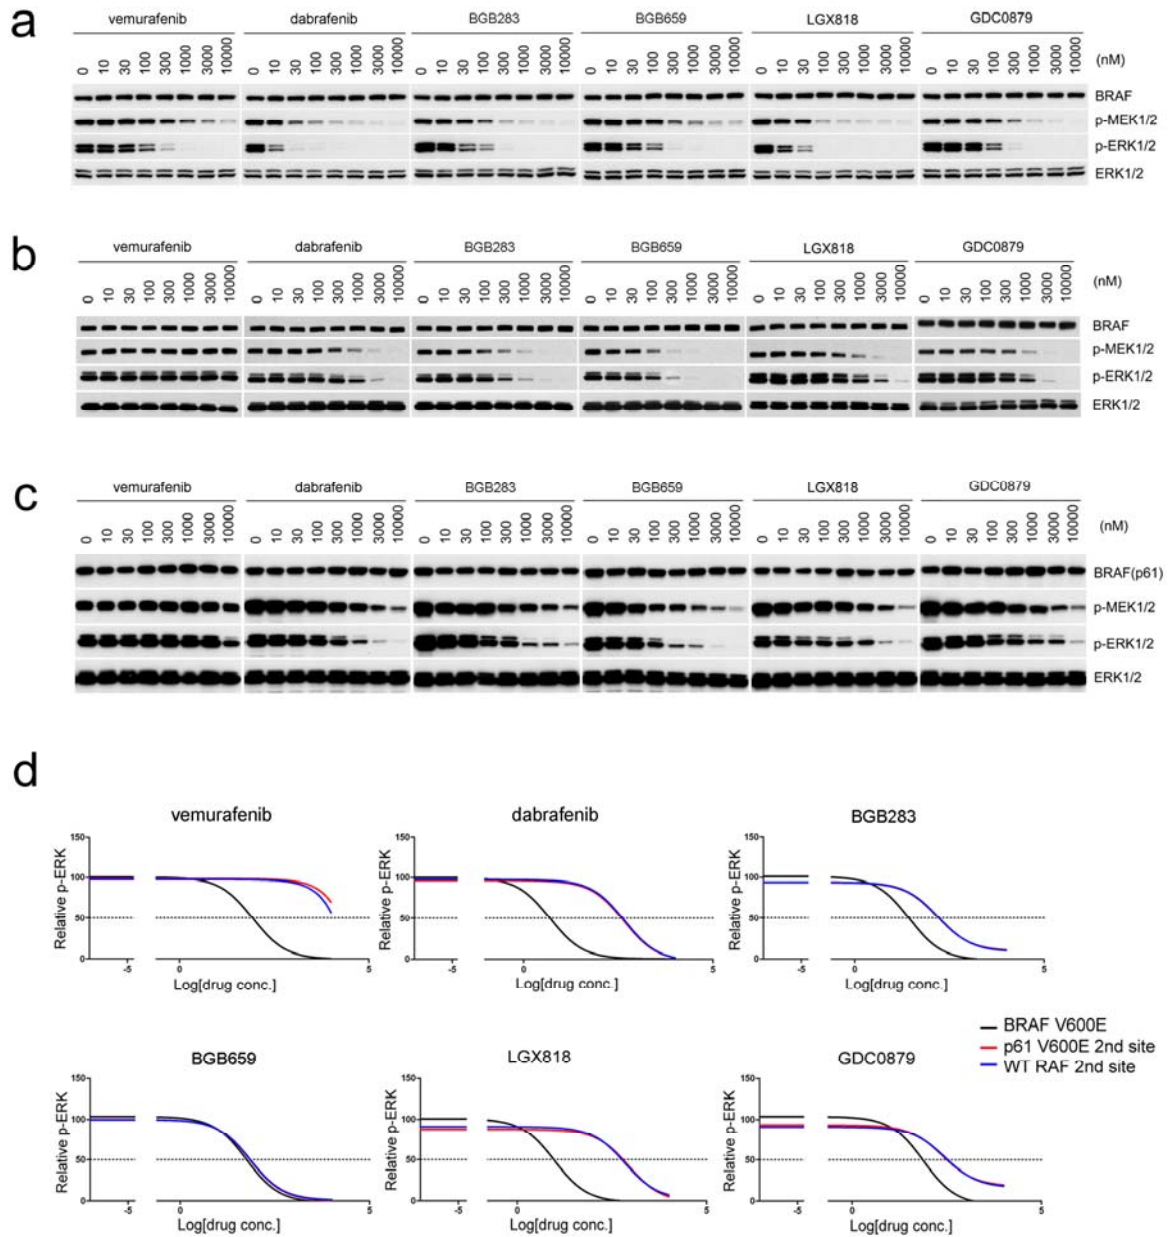

**Figure S4, related to Figure 4. Binding to one protomer of RAF dimers reduces the drug affinity to the other protomer**

(A) BRAF V600E and p61 V600E R509H were transiently expressed in SKBR3 cells. After 24 hr, the cells were treated with 1  $\mu$ M lapatinib for 1 hr and then vemurafenib for 1 hour at the indicated doses. The cell lysates were then assayed by Western blot using the antibodies indicated.

(B) p61 WT BRAF was transiently expressed in SKBR3 cells. After 24 hr, cells were treated with lapatinib (1  $\mu$ M for 1 hr) followed by vemurafenib for 1 hr at the concentrations indicated. The expression of p61 WT and activation of ERK signaling were determined by Western blot.

(C) Vemurafenib mediated inhibition of p61 V600E R509H (as shown in (A)) and activation of p61 WT (as shown in (B)) are shown as relative changes in p-ERK levels as quantitated by densitometry analysis as a function of drug concentration. Response curves were generated using Prism6.

(D) SK-MEL-239 parental or C4 sub-clone cells were treated with increasing concentrations of the indicated RAF inhibitors for 1 hr. ERK pathway activity was then determined by Western blot using the antibodies indicated.

(E) SKBR3 cells were transfected with empty vector, or plasmids expressing the indicated BRAF mutants. 24 hr after transfection, cells were treated with the indicated compounds for 1 hr. Samples were then analyzed by Western blot using the antibodies indicated.

(F) A375 cells were treated with DMSO or the compounds indicated for 1 hr. Cells were then washed with pre-warmed drug free media three times and then incubated in drug-free media for another hour. Cells were then lysed and examined by Western blot using the antibodies indicated.

(G) SK-MEL-30 cells were treated with vemurafenib or LGX818 at the concentration indicated for 1 hr followed by drug washout as described above and then incubation in drug-free medium for another hour. Cells were then collected and lysed. Western blot analysis was then performed using the antibodies indicated.

(H) A375 cells (a) were treated with the indicated compounds at the listed concentrations for 1 hr. SK-MEL-30 (b) and SK-MEL-239 C4 (c) cells were treated with 1  $\mu$ M LGX818 for 1 hr, following by drug washout, followed by treatment with the indicated compounds at the concentrations listed for an additional hour. Lysates were then analyzed by Western blot using the antibodies indicated. p-ERK levels were quantitated by densitometry analysis. The data collected at all doses were then analyzed using Prism6 to generate the dose-dependent inhibition curves shown in (d).

Table S1, related to Figure 4. Chemical structures of the RAF inhibitors

| Compound Name | Structure                                                                           | Type    |
|---------------|-------------------------------------------------------------------------------------|---------|
| vemurafenib   | 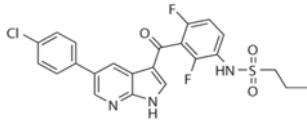   | Type I  |
| dabrafenib    |    | Type I  |
| BGB283        |    | Type II |
| BGB659        |   | Type II |
| LGX818        |  | Type I  |
| GDC0879       |  | Type I  |
| PLX7904       |  | Type I  |
| PLX8394       |  | Type I  |

**A**

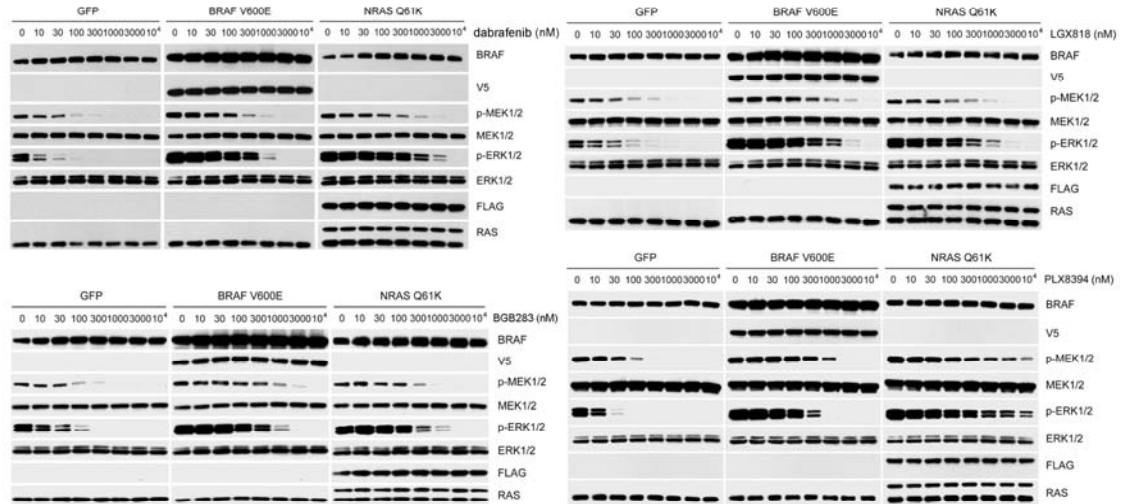

**B**

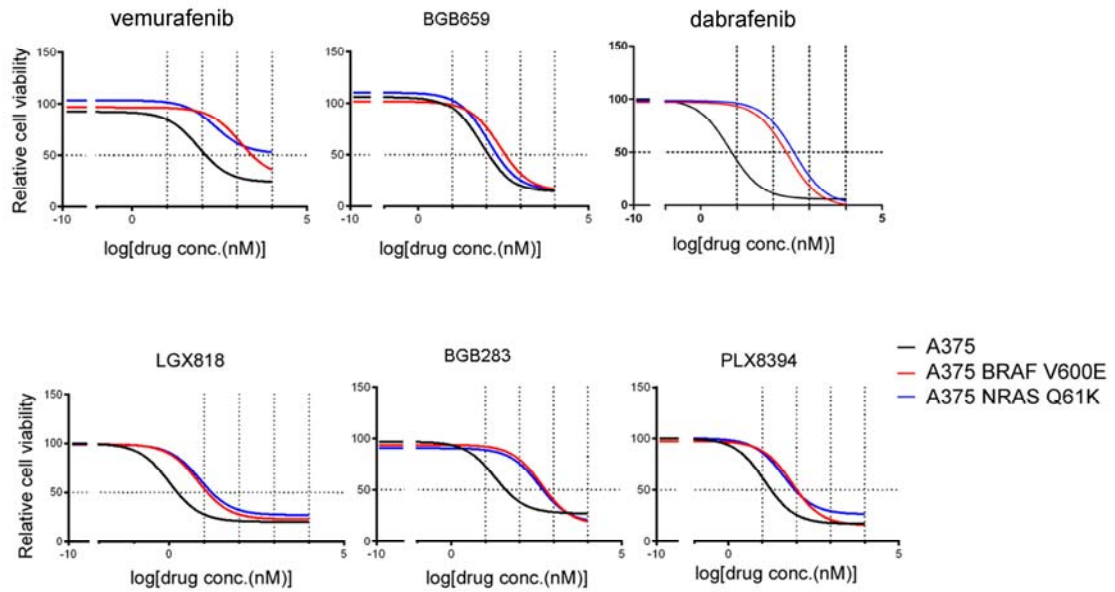

C

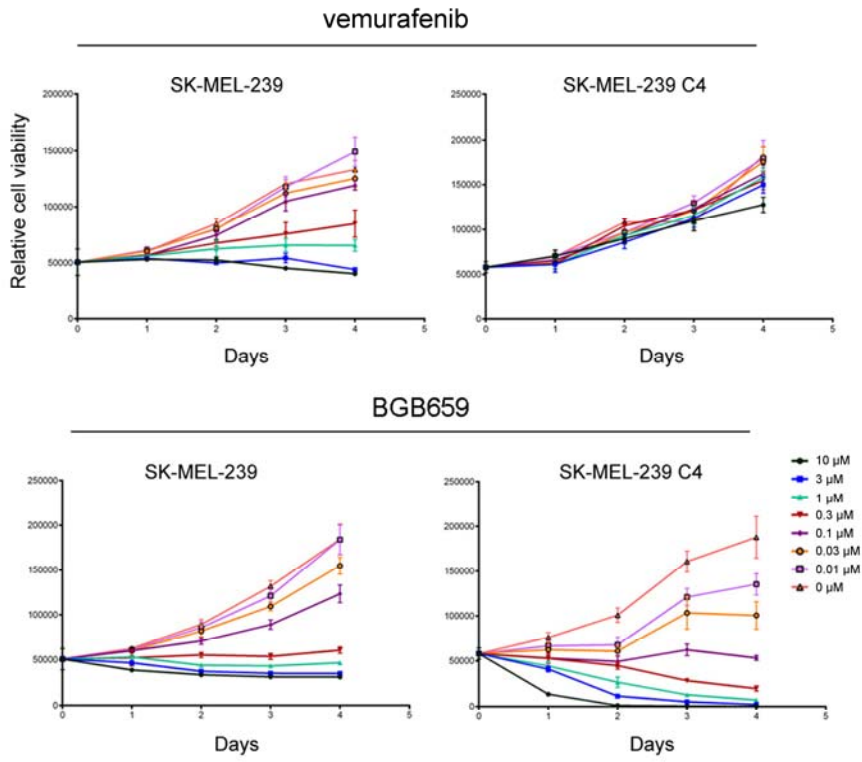

D

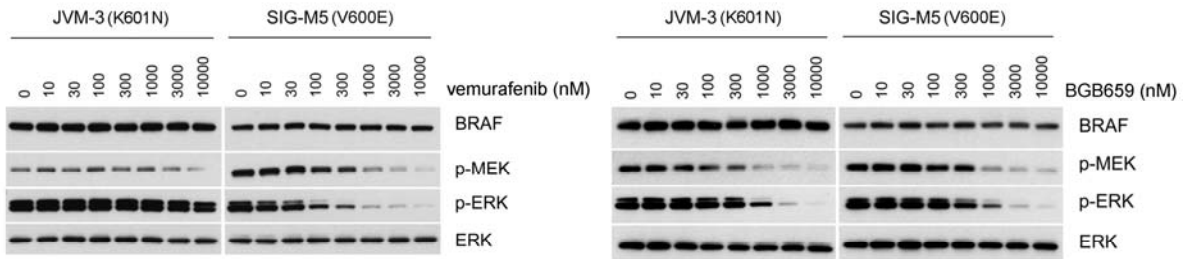

E

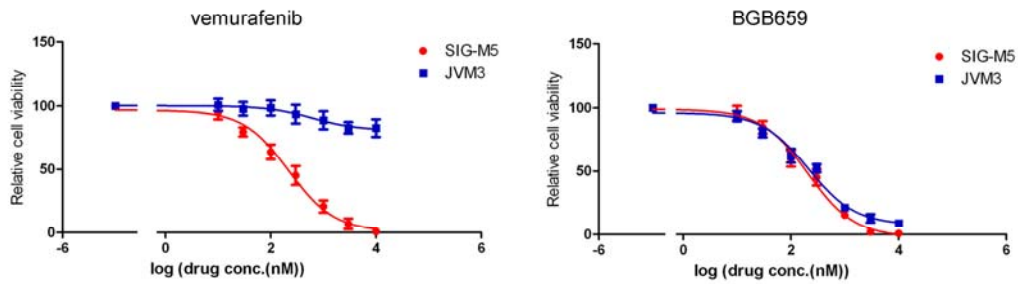

**Figure S5, related to Figure 5. BGB659 inhibits tumor cells driven by mutant BRAF dimers and the BRAF V600E monomer at similar doses.**

(A) A375 cells expressing doxycycline inducible GFP, BRAF V600E or NRAS Q61K were treated with doxycycline (2 µg/ml, 24 hr) and then treated with the compounds indicated for 1 hr. Cell lysates were then analyzed by Western blot using the antibodies indicated.

(B) Isogenic A375 cells as described in (A) were cultured in the medium containing 2 µg/ml doxycycline for 1 day. Cells (1000 cells/well) were then incubated with the compounds indicated at concentrations of 0, 10, 30, 100, 300, 1000, 3000, 10000 nM for 3 days. The effects of drug on cell growth were quantitated using the ATP-Glo assay on day 3. Graphs were generated using Prism6 based on the average of 8 replicates.

(C) SK-MEL-239 and SKMEL-239 C4 cells were grown in increasing concentrations of vemurafenib or BGB659 and then the effects of each compound on cell growth was quantitated using the ATP-Glo assay. Cells were initially seeded in 96 well plates at 1,000 cells/well. (n=8, error bars indicated S.D.)

(D) JVM-3 (BRAF K601E) and SIG-M5 (BRAF V600E) cells were treated with increasing concentrations of vemurafenib or BGB659 for 1 hour. Cell lysates were then prepared and analyzed by Western blot using the antibodies indicated.

(E) JVM-3 (BRAF K601E) and SIG-M5 (BRAF V600E) cells were treated with increasing concentrations of vemurafenib or BGB659 and cell growth was quantitated using the ATP-Glo assay after 3 days of treatment. Cells were initially seeded in 96 well plates at 5,000 cells/well. (n=8, error bars indicated S.D.)

A

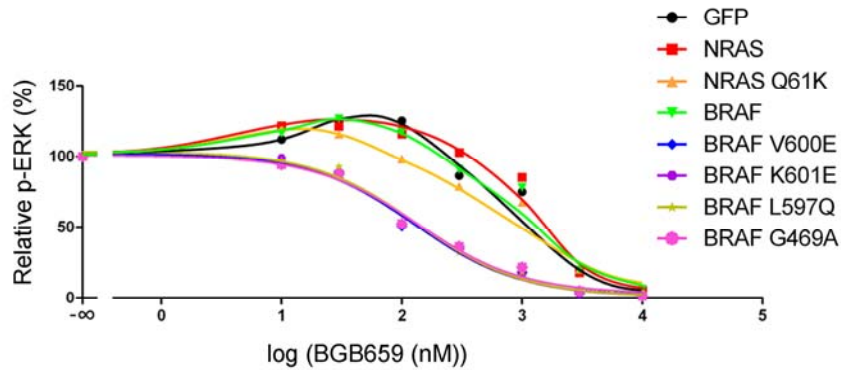

| p-ERK Inhibition      | GFP     | NRAS     | NRAS Q61K | BRAF    | BRAF V600E | BRAF K601E | BRAF L597Q | BRAF G469A |
|-----------------------|---------|----------|-----------|---------|------------|------------|------------|------------|
| IC <sub>50</sub> (nM) | 1621.8  | 2041.738 | 1513.56   | 1698.24 | 138.0384   | 147.9108   | 144.544    | 141.2538   |
| IC <sub>75</sub> (nM) | 3162.27 | 3630.781 | 2630.268  | 3162.27 | 323.5937   | 354.8134   | 346.7369   | 354.8134   |
| IC <sub>90</sub> (nM) | 6918.31 | 6456.542 | 7079.458  | 6606.93 | 1318.257   | 1412.538   | 1513.561   | 1584.893   |

B

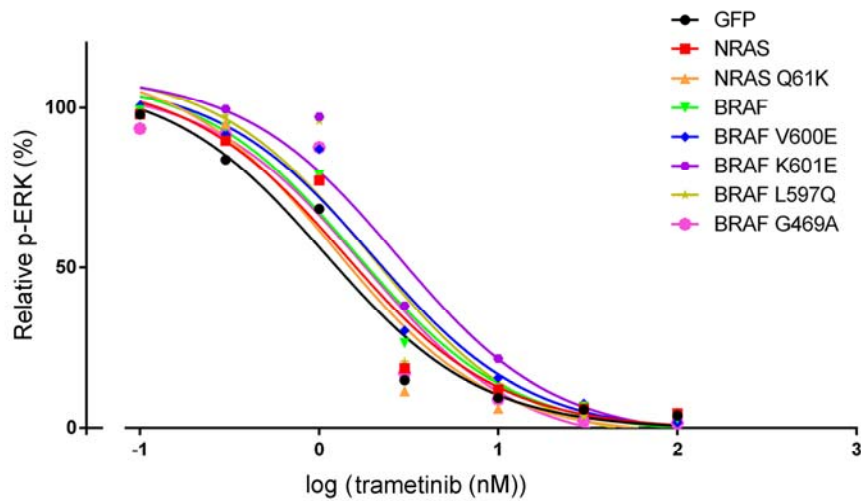



C

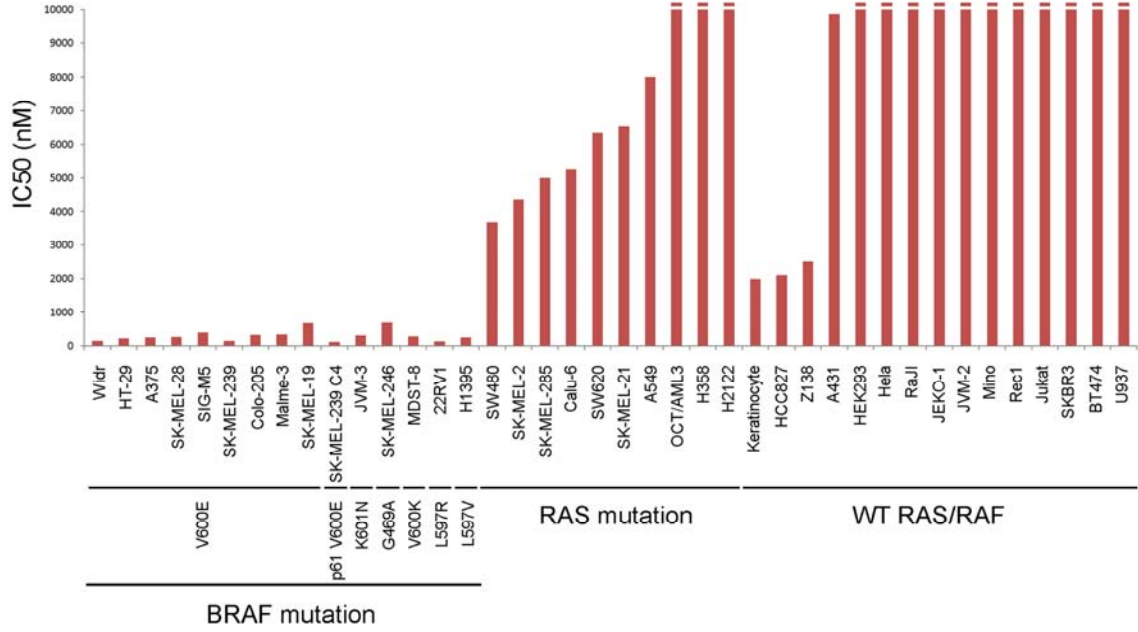

D

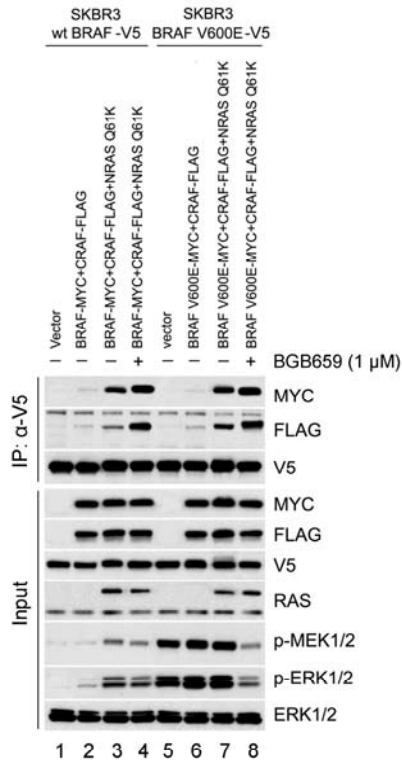

**Figure S6, related to Figure 6. RAS-dependent RAF kinase activity is less sensitive to BGB659 because the drug induces RAS-dependent RAF dimerization**

(A, B) BRAF, BRAF mutants tagged with V5, NRAS and NRAS Q61K tagged with FLAG were expressed in NIH3T3 cells upon cultured in media containing doxycycline (30 ng/ml). Cells were then treated for 1 hr with increasing concentrations of BGB659 or trametinib. Whole cell lysates were assayed by Western blot and p-ERK level were quantitated by densitometry analysis. Relative p-ERK levels were normalized to the p-ERK level of untreated cells expressing each mutant construct. The effect of BGB659 (A) and trametinib (B) on p-ERK expression was then analyzed using Prism6 to generate the IC<sub>50</sub>, IC<sub>70</sub>, and IC<sub>90</sub> values for BGB659 shown in the table in (A) .

(C) The indicated cell lines were grown in increasing concentrations of BGB659 and IC<sub>50</sub> for cell growth inhibition for BGB659 were calculated using the ATP-Glo assay. Cells were treated for 3 days with 8 different drug concentrations (0, 10, 30, 100, 300, 1,000, 3,000 and 10,000 nM) with 8 replicates at each concentration. IC<sub>50</sub> values were generated using Prism6.

(D) SKBR3 cells stably expressing BRAF-V5 and BRAF V600E-V5 were transfected with the indicated plasmids. After 24 hr, cells were treated with lapatinib (1 μM) for 1 hr, followed by DMSO or BGB659 (1 μM) for 1 hr. Cells were then collected and lysed in 1% NP40 buffer. Immunoprecipitations were performed with anti-V5 antibody to quantitate levels of homo-BRAF-dimer and hetero-BRAF/CRAF-dimer expressoin. Samples were analyzed by Western blot using the antibodies indicated.

## **Supplemental Experimental Procedures**

### **Generation of RAS-less cells**

*Hras*<sup>-/-</sup>; *Nras*<sup>-/-</sup>; *Kras*<sup>lox/lox</sup>; RERT<sup>ert/ert</sup> (K-Ras lox) MEFs were generously provide by Mariano Barbacid. MEF cells were isolated from embryonic day 13.5 embryos and immortalized using standard methods. The protocol for the generation of Ras-less cells was followed as previously reported (Drosten et al., 2010).

### **Transfections**

Cells were seeded in 60 mm or 100 mm plates and transfected the following day using Lipofectamine 2000 (Invitrogen) according to the manufacturer's instructions. A ratio of DNA to lipofectamine of 1 µg DNA/3 µl lipofectamine was employed.

### **Cell growth assays**

Cells were seeded into 96 well plates at 1000 cells per well. Cell growth was quantitated using the ATP-Glo assay (Promega) every 24 hr. For each condition, 8 replicates of each concentration were measured. IC<sub>50</sub> values were calculated using Graphpad Prizsm 6.

### **Gene inducible expression cell system**

Retrovirus encoding rtTA or the BRAF or NRAS genes was packaged in Phoenix-AMPHO cells obtained from ATCC. The medium containing virus was filtered with 0.45 PVDF filters followed by incubation with the target cells for 6 hr. Cells were then maintained in virus free media for 2 days. Cells were selected using Puromycin (2 µg/ml) or Hygromycin (250 µg/ml) for 3 days. The positive infected cell populations were further sorted using GFP as a marker after overnight exposing to 1µg/ml doxycycline. GFP positive cells were then cultured and expanded in medium without doxycycline but with antibiotics.

### **Active RAS pull-down assay**

Cells were cultured in 10cm dishes until 70-80% confluence. GTP-bound Ras was quantitated using the RAF1 Ras-binding domain (RBD) pull-down from Detection Kit (Thermo Scientific) or RAS activation assay BIOCHEM KIT (Cytoskeleton), as instructed by the manufacturers.

### **Supplemental References**

Drosten, M., Dhawahir, A., Sum, E.Y., Urosevic, J., Lechuga, C.G., Esteban, L.M., Castellano, E., Guerra, C., Santos, E., and Barbacid, M. (2010). Genetic analysis of Ras signalling pathways in cell proliferation, migration and survival. *The EMBO journal* 29, 1091-1104.
